# 1 **HaploVectors: an integrative analytical tool for phylogeography**

2 *Leandro Duarte<sup>1\*</sup>, Jacqueline de Souza Lima<sup>1</sup>, Renan Maestri<sup>1</sup>, Vanderlei Debastiani<sup>1</sup> &*

3 *Rosane Garcia Collevatti<sup>2</sup>*

4 *<sup>1</sup> Departamento de Ecologia, Universidade Federal do Rio Grande do Sul*

5 *Av. Bento Gonçalves 9500 CP 15007, Porto Alegre, RS, 91501-970, Brazil*

6 *<sup>2</sup> Laboratório de Genética & Biodiversidade, Instituto de Ciências Biológicas, Universidade*

7 *Federal de Goiás. 74690-900, Goiânia, GO, Brazil*

8 \* E-mail corresponding author: [duarte.ldas@gmail.com](mailto:duarte.ldas@gmail.com)

9 **Running head:** Haplotypic eigenvectors for phylogeography

## 10 **Abstract**

11 Phylogeographic approaches are commonly used to understand historical-biogeographic  
12 patterns in the distribution of haplotypes. However, the emphasis of most tools lies on  
13 describing spatial patterns of genetic variation and assess how large are haplotypic differences  
14 among populations. An evaluation of the relative influence of environmental factors  
15 compared to pure neutral process of haplotypic distribution - a question of great interest for  
16 molecular ecologists - is less investigated, in part because appropriate tools are lacking. Here,  
17 we introduce HaploVectors, a flexible tool that allows exploring phylogeographical patterns  
18 and discriminating biogeographic, neutral and environmental factors acting to shape genetic  
19 distribution across space. HaploVectors are variables that summarize the major gradients of  
20 haplotypic distribution across a set of localities and allow weighting haplotypic frequencies  
21 by the number of mutational steps using a fuzzy weighting approach. HaploVectors is  
22 presented as an R package for computing haplotypic eigenvectors and performing null model-  
23 based tests. Investigation of HaploVectors using empirical datasets showed that the method is

24 useful to uncover hidden patterns of haplotypic distribution, not easily detected using  
25 traditional methods. Using a plant species as study case, we demonstrate by means of  
26 HaploVectors that, even though the distribution of plant haplotypes was associated with  
27 different biogeographic regions of the Brazilian Cerrado biome, such association was not  
28 mediated by evolutionary relationships among haplotypes. The applicability of HaploVectors  
29 is broad, ranging from the pure pattern exploration and discrimination of genetic populations,  
30 to a hypothesis-testing framework that uses null-models to understand the influence of  
31 environmental factors on haplotypic distribution.

32 **Keywords:** Fuzzy set theory, haplotypic eigenvectors, haplotype network, principal  
33 coordinates of genetic structure

34

## 35 **Introduction**

36 A complete understanding of the historical and biogeographic patterns of species distribution  
37 benefits from the connection between micro and macroevolution, a major goal of the field of  
38 phylogeography (Avice, 1987; Avice, 2009). Since the middle 1990's, the number of studies  
39 using molecular markers to understand phylogeographical patterns is increasing at astonishing  
40 rates (Beheregaray, 2008; Turchetto-Zolet, Pinheiro, Salgueiro & Palma-Silva, 2013).

41 Accordingly, the number of molecular markers used increased from single locus to multiple  
42 genome regions (Freeland, 2014; Blom, Horner & Moritz, 2016). Testing hypotheses about  
43 ecological influences on the genealogical history of populations from a single species, and the  
44 comparison of such patterns across multiple species (comparative phylogeography), has the  
45 potential to shed light on process of species diversification and on the geological and  
46 biogeographic connections of entire regions (Diniz-Filho et al., 2008; Carnaval et al., 2014).

47 However, hypothesis testing in a rigorous statistical framework were only latter incorporated  
48 into phylogeography, with the advent of statistical phylogeographical approaches (Templeton  
49 et al., 1998; Papadopoulou & Knowles, 2016) that helped moving the field beyond the  
50 essential descriptive nature present in its infancy. Still, the development of analytical tools to  
51 integrate the ecological thinking into phylogeography has lagged behind the ever-increasing  
52 number of molecular loci discovered and the numerous tools focused on spatial genetics (e.g.,  
53 Templeton, 2004; Miller, 2005; Epperson, 2005). In the era of multiple molecular markers  
54 and genomics in phylogeography, new analytical tools are imperative to better understand the  
55 increasingly complex phylogeographical patterns, to compare results from different loci, and  
56 to uncover environmental correlates of genetic distribution in the 'twilight zone' (Diniz-Filho  
57 et al., 2008).

58           A principal goal in studies of molecular ecology and phylogeography is to understand  
59 to what extent genetic variation of a species, expressed as the spatial distribution of alleles,  
60 genotypes and haplotypes, might be affected by different factors, such as dispersal  
61 mechanism, history of populations, climate changes or just by isolation by distance (Manel,  
62 Schwartz, Luikart & Tarbelet, 2003, Storfer et al., 2007, Avise, 2009). To explore processes  
63 underlying genetic diversity distribution, a representation of evolutionary relationships among  
64 organisms or populations by means of phylogenetic trees or networks is often performed. In  
65 this sense, networks are recognized to be more appropriate than trees, since the former allow  
66 visualization of reticulation events, such as hybridization and recombination (Kong, Sánchez-  
67 Pacheco & Murphy, 2015). Nonetheless, a network representation per se does not allow  
68 robust hypothesis tests to evaluate the interplay between genetic variation across space and  
69 alternative explanatory factors. Analysis of molecular variance (AMOVA, Excoffier, Smouse  
70 & Quattro, 1992) has been widely used for this purpose (Fitzpatrick, 2009; Maestri et al.,  
71 2016; Raffini et al., 2018). AMOVA, which is a permutation procedure akin to approaches  
72 often used in ecological studies, such as PERMANOVA (Pillar & Orlóci, 1996; Anderson,  
73 2001) allows analyzing whether pairwise genetic dissimilarities between individuals  
74 distributed across different sites or regions defined by groups of sites is higher than expected  
75 by chance given within site (or region) dissimilarities. Note that AMOVA is based on overall  
76 genetic dissimilarities, and therefore does not permit direct inference about effects of spatial,  
77 environmental and/or biogeographic factors on the distribution of haplotypes across space.

78           Despite debates about different methods to construct haplotypes networks (see  
79 Mardulyn et al., 2012), phylogenetic median-joining network (MJN, Bandelt, Forster & Röhl,  
80 1999) is the method normally used in phylogeographical studies. The MJN method is based in  
81 the minimum spanning trees and shows the relationships between haplotypes obtained by the

82 distance measured among them (e.g. number of character differences - Hamming distance).  
83 The use of MJN has been grown exponentially since its development (Kong et al., 2015).  
84 Moreover, the network representation used to explore evolutionary relatedness among  
85 haplotypes do not allow neither a clear visualization of haplotype co-occurrence within sites  
86 nor general trends in haplotype distribution across space.

87 Phylogenetic eigenvectors have been used to express the variation of phylogenetic  
88 beta diversity (or simply phylobetadiversity) among an array of localities (Duarte, 2011;  
89 Duarte, Debastiani, Freitas & Pillar, 2016) based on phylogenetic fuzzy weighting (Pillar &  
90 Duarte, 2010). Phylogenetic fuzzy weighting allows describing sites by their phylogenetic  
91 composition based on species incidences/abundances and the phylogenetic relatedness among  
92 species (see also Duarte et al., 2016). The phylogenetic composition of a set of sites can be  
93 thereby decomposed into independent phylogenetic eigenvectors using Principal Coordinates  
94 of Phylogenetic Structure, or simply PCPS (Duarte, 2011; Duarte et al., 2016). Each  
95 eigenvector describes the sites by scores that position them along a phylogenetic gradient  
96 expressing a fraction of the total phylogenetic relatedness among the species distributed  
97 across the sites. By doing so, PCPS analysis renders single variables that synthesize  
98 phylogenetic gradients, and thereby can be used to analyses addressing environmental, spatial  
99 or biogeographic determinants of phylogeny-mediated species distribution (Duarte, Bergamin,  
100 Marcilio-Silva, Seger & Marques, 2014; Carlucci et al., 2016).

101 In this study we introduce HaploVectors, a new flexible analytical tool for molecular  
102 ecologists to disentangle biogeographic or environmental factors driving haplotypic  
103 distribution across space. For this, HaploVectors extends the application of phylogenetic  
104 fuzzy weighting in order to describe the distribution of haplotypes across sets of localities,  
105 allowing flexible exploratory analysis. Moreover, by applying appropriate null models,

106 HaploVectors allows to analyze multiple determinants of the frequencies of haplotypes, as  
107 well as the number of mutations separating different haplotypes, across sets of localities,  
108 providing robust hypotheses tests for phylogeographical studies. We demonstrate the  
109 application of HaploVectors in two empirical datasets.

## 110 **Materials and Methods**

### 111 *Haplotypic eigenvectors*

112 Haplotypic eigenvector analysis and hypotheses tests based on null models were implemented  
113 in the R package *HaploVectors* (freely available at  
114 <https://github.com/vanderleidebastiani/HaploVectors>). The function ‘HaploVectors’ allows  
115 defining the frequency of each haplotype across a set of localities from where the individuals  
116 were sampled and to weight those frequencies across localities according to the number of  
117 mutational steps between all pairs of haplotypes arranged into a network based on fuzzy set  
118 theory (Zadeh, 1965). Further, the function implements null model tests to analyze the  
119 influence of environmental, biogeographic or spatial variables on the distribution of  
120 haplotypes across sets of localities, as well as to estimate to what extent such influence is  
121 mediated by the evolutionary distance between haplotypes. The rationale underlying the  
122 HaploVectors approach, including the null model tests, was adapted from phylogenetic fuzzy  
123 weighting (Pillar & Duarte, 2010), a method originally developed to analyze multiple  
124 determinants of phylogenetic composition across metacommunities based on fuzzy set theory  
125 (see details on the method in Duarte et al., 2016).

126 The first analytical step implemented in HaploVectors consists of defining haplotypes  
127 for a set of samples and computing the frequency (number of individuals) of each haplotype  
128 per locality. For this, two input datasets are required: (1) a \*.fas file containing aligned

129 genetic sequences for each sampled individual, and (2) a matrix describing the incidence of  
130 each individual (rows) in a given locality (column). Based on these two datasets, the function  
131 ‘HaploNetDist’ extracts the haplotypes for the \*.fas file using the function ‘haplotype’, and  
132 computes an haplotypic network using the function ‘haploNet’, functions originally  
133 implemented in the R package *pegas* (Paradis, 2010).

134 Further, ‘HaploNetDist’ computes the frequency of each haplotype per locality  
135 (matrix **W**), and submit **W** to fuzzy weighting as follows: From the matrix **D** describing all  
136 pairwise distances between haplotypes based on the number of mutational steps between any  
137 pair of haplotypes, remove all distances between haplotypes *not* connected in the network,  
138 replacing them by the mutations separating two haplotypes in the network plus one. This  
139 procedure generates matrix **D<sub>N</sub>**, which reproduces haplotype connections described in the  
140 network. Matrix **D<sub>N</sub>** is further converted into a similarity matrix **S** describing the similarities  
141 between all pairs of haplotypes *i* and *j* ( $s_{ij}$ , ranging between 0 and 1), as follows:

142

$$s_{ij} = 1 - \left( \frac{d_{ij}}{\max(d_{ij})} \right)$$

143  $d_{ij}$  is the number of mutations separating the haplotypes *i* and *j* in **D<sub>N</sub>**, and  $\max(d_{ij})$  is  
144 the maximum number of mutations between any pair of haplotypes in the network. Matrix **S**  
145 is then standardized by marginal total within columns, generating a matrix **Q** that describes  
146 fuzzy belongings between haplotypes (Pillar & Duarte, 2010; Duarte et al., 2016). Matrix **Q**,  
147 containing haplotypic fuzzy sets are then employed to weight the frequencies of haplotypes  
148 per locality described in matrix **W** by their evolutionary relatedness, generating matrix **P**,  
149 which describes localities by their haplotypic composition, that is, haplotype frequencies per  
150 locality weighted by their evolutionary relatedness. The output of HaploVectors function  
151 provides matrices **W**, **D**, **D<sub>N</sub>**, **Q** and **P**.

152 Performing principal coordinates on  $\mathbf{P}$  generates haplotypic eigenvectors, which  
153 decompose the total variation in the haplotypic composition across the set of localities into  
154 independent fractions proportional to its respective eigenvalue  $\lambda$ . Those eigenvectors  
155 representing the higher amount of variation in  $\mathbf{P}$  can be used to explore major trends in  
156 haplotype distribution across the localities. Those localities sharing most haplotypes will  
157 show similar scores, and therefore will group to each other in the scatter plot. Thus, this  
158 scatter plot allows simultaneously explore evolutionary links among haplotypes and localities.

159 The function ‘HaploVectors’ also allows analyzing multiple environmental,  
160 biogeographic or spatial determinants of haplotype distribution across a set of localities, and  
161 therefore is a useful tool for robust hypothesis test in phylogeography. For this, the function  
162 implements two null model tests, adapted from Duarte et al. (2016) and designed to test the  
163 following hypotheses:

164 Hypothesis 1: *A given environmental, biogeographic or spatial factor  $E$  affects the*  
165 *distribution of haplotypes across a set of localities.* This hypothesis is tested by means of a  
166 null model called *site shuffle*, which is a classical permutation-based procedure assuming  
167 independence between haplotypes and localities. The test can be performed based on either  
168 haplotypic dissimilarities between localities computed based on  $\mathbf{P}$  (hereafter  $D_{\mathbf{P}}$ ) using an  
169 appropriate resemblance measure, such as Euclidean distances or Bray-Curtis dissimilarities  
170 (Legendre & Legendre, 2012), or directly on single haplotypic eigenvectors. The test consists  
171 of 1) computing a  $F_{\text{Obs}}$  statistic. If  $D_{\mathbf{P}}$  is modeled on  $\mathbf{E}$ , the test is based on a dissimilarity  
172 regression on distance matrices (hereafter called ADONIS; see McArdle & Anderson, 2001).  
173 For single haplotypic eigenvectors modeled on  $\mathbf{E}$ , the test is an ordinary linear squares (OLS)  
174 model; 2) freely permuting the localities a number of times (say 999); 3) at each permutation  
175 step, computing  $F_{\text{null}}$ ; and 4) defining the probability of obtaining the observed statistic by



176 chance ( $H_0 = F_{\text{Obs}} \leq F_{\text{null}}$ ), as the proportion of permutations in which  $F_{\text{null}}$  exceeded  $F_{\text{Obs}}$ .  
177 Using this procedure, the test simultaneously addresses the influence of **E** on the distribution  
178 of haplotypes across the localities (the number of haplotypes shared between pairs of  
179 localities) and to what extent such influence is mediated by the evolutionary relatedness  
180 between the haplotypes (the number of mutational steps between the pairs of haplotypes).  
181 Therefore, even if this first hypothesis is corroborated ( $H_0$  is rejected), such test does not  
182 allow us to conclude that the influence of **E** on haplotype distribution is or is not dependent  
183 on the evolutionary relatedness among haplotypes. To accomplish that, it is necessary to test a  
184 second hypothesis, which is conditioned on the validity of the first one:

185       Hypothesis 2: *The influence of **E** on the distribution of haplotypes across a set of*  
186 *localities depends on the evolutionary relatedness among them.* To test this hypothesis, a  
187 second round of permutations (*network shuffle*) is needed in order to compute  $F_{\text{null}}$ .  
188 Accordingly, the frequency of haplotypes in **W** is kept constant across the localities while  
189 evolutionary relatedness between them is permuted by haplotype label shuffling (Kembel et  
190 al., 2010). After computing  $F_{\text{Obs}}$  (step 1, as described for site shuffle), the procedure consists  
191 of 2) freely permuting haplotype labels in the network to generate random evolutionary  
192 relatedness among haplotypes and computing null matrices **D**, **D<sub>N</sub>**, **Q** and **P**. The procedure is  
193 repeated 999 times; 3) at each permutation procedure, computing null  $D_{\text{P}}$  and, if necessary,  
194 null haplotypic eigenvectors. In this later case, null haplotypic eigenvectors are submitted to  
195 procrustean adjustment (Jackson, 1995) and fitted values between observed and null  
196 eigenvectors are obtained; 4) take null  $D_{\text{P}}$  or selected adjusted null eigenvectors as response  
197 variable in ADONIS or OLS, respectively, using **E** as predictor, and compute  $F_{\text{null}}$  values; 5)  
198 generating a set of  $F_{\text{null}}$  to get the probability under the null hypothesis ( $H_0 = F_{\text{Obs}} \leq F_{\text{null}}$ ); 6)  
199 defining a probability under the null hypothesis.

200 By performing both null model tests, two probability values are generated. Previous  
201 analyses using simulated data demonstrated that both null models show appropriate type I  
202 error and statistical power (Duarte et al., 2016). Using site shuffle, whenever the null  
203 hypothesis is rejected, we conclude that **E** affects the distribution of haplotypes across a set of  
204 localities (hypothesis 1). Then we proceed to test for the hypothesis 2 (via network shuffle). If  
205 the null hypothesis is rejected, we conclude that the influence of **E** on the distribution of  
206 haplotypes across the localities depends on the evolutionary relatedness among them. In Fig.  
207 1 we illustrate the expected distribution of haplotypes and the respective probabilities  
208 generated under site and network shuffle models.

#### 209 *Application using empirical datasets*

210 We demonstrate the application of HaploVectors in phylogeographical analyses through two  
211 empirical data sets: a set of cpDNA sequences from 333 adult individuals of *Eugenia*  
212 *dysenterica*, a tree species from Myrtaceae family, sampled from 23 localities (Lima, Telles,  
213 Chaves, Lima-Ribeiro & Collevatti, 2017), and a set of cpDNA sequences from 257 adult  
214 individuals of *Mauritia flexuosa*, a palm tree sampled from 26 localities (Lima, Lima-Ribeiro,  
215 Tinoco, Terribile & Collevatti, 2014). Both data sets are available at GenBank (accession  
216 numbers: MF752706- MF753038 and KC527837-KC528609, respectively).

#### 217 *Dataset 1: Eugenia dysenterica*

218 Using a phylogeographical approach, Lima et al. (2017) investigated the spatial pattern of  
219 genetic diversity on *E. dysenterica*, a widely distributed tree species in the Brazilian savanna.  
220 Four regions of the chloroplast were sequenced from individuals sampled at 23 populations  
221 throughout its distribution (for details about sampling and genetic data see Lima et al., 2017).  
222 The authors inferred the phylogenetic relationships among haplotypes using median-joining

223 network analysis. Furthermore, Analysis of Molecular Variance (AMOVA) was used to  
224 analyze spatial patterns of genetic variation among biogeographic regions of the Cerrado  
225 biome (Table 1). Although AMOVA pointed out genetic differentiation among sites located at  
226 three different Cerrado regions (Central, Northeast and Southeastern;  $P < 0.001$ ), the results  
227 of the network analysis visually suggested that the phylogenetic relationships among  
228 haplotypes did not match the geographical distribution of the lineages (Fig. 2a).

229 We analyzed the variation in the distribution of haplotypes across the biogeographic  
230 regions of the Cerrado using HaploVectors approach. Our hypotheses propose that (1) the  
231 spatial distribution of haplotypes varies among the different biogeographic regions of the  
232 Cerrado biome, and that (2) the biogeographic distribution of haplotypes across the Cerrado  
233 regions depends on the evolutionary relationships among them. We tested these hypotheses  
234 using ADONIS, based on haplotypic dissimilarities between localities ( $D_P$ ), and OLS using  
235 haplotypic eigenvectors. For ADONIS, we computed matrix  $\mathbf{P}$  using log-transformed  
236 frequencies of haplotypes per site (matrix  $\mathbf{W}$ ) and square-rooted Hamming distances between  
237 haplotypes (matrix  $\mathbf{D}_N$ ). Haplotypic dissimilarities between sites were computed using  
238 Euclidean distances. The same three biogeographic regions of Cerrado were taken as a  
239 categorical predictor in the analysis (matrix  $\mathbf{E}$ ). For OLS, we first computed haplotypic  
240 eigenvectors (haplo vectors) based on  $D_P$ . Haplo vectors containing more than 5% of total  
241 information in  $\mathbf{P}$  were taken as response variables in linear models, while  $\mathbf{E}$  was used as  
242 predictor.

#### 243 Dataset 2: *Mauritia flexuosa*

244 *Mauritia flexuosa* is a dioecious palm species distributed widely across South America,  
245 occurring in Brazilian savannas and Amazonia (Lima et al., 2014). Because its occurrence is  
246 associated with wetlands, Lima et al. (2014) investigated spatial patterns in chloroplast

247 genome regions among populations of *M. flexuosa* occurring across four different river basins  
248 (Amazon, Araguaia/Tocantins, Paraná and São Francisco). For this purpose, the authors  
249 estimated phylogenetic relationships among haplotypes using the median-joining network  
250 analysis and performed a hierarchical analysis of molecular variance (AMOVA) to analyze  
251 the genetic differentiation among populations from different river basins. The haplotypic  
252 network (Fig. 2c) did not allow a clear congruence between the geographic distribution of  
253 phylogenetic lineages and river basins, although AMOVA found significant genetic  
254 differentiation among river basins (Table 1). For this dataset we performed similar analyses as  
255 described for *E. dysenterica*.

## 256 **Results**

257 For analyses performed using *E. dysenterica* dataset, ADONIS indicated that sites occurring  
258 at the same biogeographic region of the Cerrado biome share more haplotypes with each other  
259 than with sites located at different regions ( $P_{\text{site shuffle}} = 0.001$ , Table 1); nonetheless, such  
260 difference in haplotype composition is not related with evolutionary relatedness among  
261 haplotypes ( $P_{\text{network shuffle}} = 0.973$ ). The two first haplo vectors (Fig. 2b), containing 32% and  
262 17% of total variation in haplotype composition of sites, respectively, indicated association  
263 between haplotype distribution across sites and biogeographic regions ( $P_{\text{site shuffle}} < 0.02$ ). The  
264 first haplo vector shows a separation of populations from Southeast Brazil (green circles) from  
265 other regions (Fig. 2b), which relies only on haplotype composition, but not evolutionary  
266 relatedness among haplotypes ( $P_{\text{network shuffle}} = 0.936$ ). On the other hand, the second  
267 haplo vector discriminated some populations from Northeast Brazil from other regions (Fig.  
268 2b). In this case, an evolutionary signal in the association between haplotype composition of  
269 sites and biogeographic regions was detected ( $P_{\text{network shuffle}} = 0.024$ ), based mostly on the  
270 evolutionary path from haplotype one to 19 to 11 (Figs. 2a, 2b).

271 For the *Mauritia flexuosa* dataset, ADONIS rejected null hypothesis for both site  
272 shuffle and network shuffle null models (Table 1), indicating that haplotype composition  
273 differed between river basins ( $P_{\text{site shuffle}} = 0.01$ ), and that such difference was mediated by  
274 evolutionary relatedness between haplotypes ( $P_{\text{network shuffle}} = 0.005$ ). For this dataset, only the  
275 first haplovector (Fig. 2d), containing 42% of total variation in haplotype composition of  
276 sites, indicated association between haplotype distribution across sites and river basins ( $P_{\text{site}}$   
277  $\text{shuffle} = 0.021$ ), which was mediated by evolutionary relatedness between haplotypes ( $P_{\text{network}}$   
278  $\text{shuffle} = 0.007$ ). The first haplovector showed a clear separation between populations located in  
279 Amazon (left side of the plot in Fig. 2d), which were related to haplotypes seven and eight  
280 (Fig. 2c), and Araguaia/Tocantins basins (right side of the plot in Fig. 2d), mostly associated  
281 with haplotypes one to five.

## 282 **Discussion**

283 Current implemented methods for phylogeographical analyses treat haplotypic frequency  
284 across localities over a given environmental gradient/factor and phylogenetic relationships  
285 among those haplotypes in disconnected manners, lacking a clear conceptual framework to  
286 integrate both. Haplo-vectors provide such integration, allowing disentangling the  
287 environmental or biogeographic influence on haplotypic distribution and assessing whether  
288 that distribution is resulting from the evolutionary relationship among haplotypes. In cases  
289 where AMOVA (Excoffier et al., 1992) and analyses using haplotype networks (e.g.,  
290 Templeton, 1998) reveal contradicting results of haplotypic distributions, we propose that  
291 HaploVectors can elucidate the conundrum.

292 In the first example (*E. dysenterica* dataset) we found that the influence of  
293 biogeographic regions at structuring haplotypes is independent from the evolutionary  
294 relatedness among them (i.e. the number of mutational steps separating haplotypes). This

295 shows that biogeographic regions are indeed structuring haplotypes (i.e. different haplotypes  
296 can be found in different regions, implying few haplotypes occurring in more than one  
297 region), however, inside any given biogeographic region, haplotypes are not the closely  
298 related to each other based on the phylogenetic relationships among haplotypes. This means  
299 that phylogenetic closely related haplotypes occur in distinct biogeographic regions, and each  
300 biogeographic region comprises exclusive haplotypes from multiple evolutionary origins.

301 Different from that observed in *E. dysenterica* dataset, for the *M. flexuosa* dataset we  
302 found that haplotype composition differed between river basins and this difference was  
303 associated with the evolutionary relatedness among haplotypes. This reveals that haplotypes  
304 that occur in the same river basins are more phylogenetically related than those that occur in  
305 different river basins. These interpretations provided by HaploVectors solve the apparent  
306 paradox found in the results of previous analyses in both cases: the AMOVA found  
307 haplotypic differences among biogeographic regions and river basins; however, the  
308 haplotypic network failed to reveal a clear structured haplotypic distribution over the same  
309 regions. The null model tests implemented in HaploVectors permit treating the haplotype  
310 frequency across localities on a given environmental factor, independently from the  
311 phylogenetic similarities among haplotypes. The combination of both tests in a joint approach  
312 allows for tracing a complete picture of the evolutionary history of populations.

313 We hope that this approach will be useful in all cases where the distribution of  
314 haplotypes is hypothesized to be under the influence of an environmental or biogeographic  
315 factor. These questions are likely to be encountered with increasingly frequency by molecular  
316 ecologists and phylogeographers.

## 317 **Acknowledgements**

318 The authors thank Jorge Sebastião Bernardo-Silva for valuable discussion on the topic  
319 addressed in this paper. LDS research activities have been supported by CNPq Productivity  
320 Fellowship (grant 307886/2015-8). RGC research activities have been supported by CNPq  
321 Productivity Fellowship. JSL receives a fellowship from CNPq (project 439051/2016-9). The  
322 authors have no conflict of interests to declare. LDS, JSL and RGC are members of the  
323 National Institutes for Science and Technology (INCT) in Ecology, Evolution and  
324 Biodiversity Conservation, supported by MCTIC/CNPq (proc. 465610/2014-5) and FAPEG.

## 325 **References**

- 326 Anderson, M. J. (2001). A new method for non-parametric multivariate analysis of variance.  
327 *Austral Ecology*, 26, 32-46. doi: 10.1111/j.1442-9993.2001.01070.pp.x
- 328 Avise, J. C., Arnold, J. & Ball, R.M., Bermingham, E., Lamb, T., Neigel, J.E., ... Saunders,  
329 N.C. (1987). Intraspecific phylogeography: the mitochondrial DNA bridge between  
330 population genetics and systematics. *Annual Review of Ecology and Systematics*, 18, 489-  
331 522. doi: 10.1146/annurev.es.18.110187.002421
- 332 Avise, J. C. (2009). Phylogeography: retrospect and prospect. *Journal of Biogeography*, 36,  
333 3-15. doi: 10.1111/j.1365-2699.2008.02032.x
- 334 Bandelt, H. J., Forster, P. & Röhl, A. (1999). Median-joining networks for inferring  
335 intraspecific phylogenies. *Molecular Biology and Evolution*, 16, 37-48. doi:  
336 10.1093/oxfordjournals.molbev.a026036
- 337 Beheregaray, L. B. (2008). Twenty years of phylogeography: the state of the field and the  
338 challenges for the Southern Hemisphere. *Molecular Ecology*, 17, 3754-3774. doi:  
339 10.1111/j.1365-294X.2008.03857.x
- 340 Blom, M. P. K., Horner, P. & Moritz, C. (2016). Convergence across a continent: adaptive  
341 diversification in a recent radiation of Australian lizards. *Proceedings of the Royal*  
342 *Society B: Biological Sciences*, 283, 20160181. doi: 10.1098/rspb.2016.0181
- 343 Carlucci, M. B., Seger, G. D. S., Sheil, D., Amaral, I. L., Chuyong, G. B., Ferreira, L. V., ...  
344 Duarte, L. S. (2016). Phylogenetic composition and structure of tree communities shed  
345 light on historical processes influencing tropical rainforest diversity. *Ecography*, 40, 521-  
346 530. doi: 10.1111/ecog.02104
- 347 Carnaval, A. C., Waltari, E., Rodrigues, M. T., Rosauer, D., VanDerWal, J., Damasceno, R.,  
348 ... Moritz, C. (2014) Prediction of phylogeographic endemism in an environmentally  
349 complex biome. *Proceedings of the Royal Society B: Biological Sciences*, 281, 20141461.  
350 doi: 10.1098/rspb.2014.1461
- 351 Diniz-Filho, J. A. F., Telles, M. P. C., Bonatto, S. L., Eizirik, E., Freitas, T. R. O., De Marco  
352 Jr, P., ... Soares, T. N. (2008). Mapping the evolutionary twilight zone: molecular  
353 markers, populations and geography. *Journal of Biogeography*, 35, 753-763. doi:  
354 10.1111/j.1365-2699.2008.01912.x
- 355 Duarte, L. D. S. (2011). Phylogenetic habitat filtering influences forest nucleation in  
356 grasslands. *Oikos*, 120, 208-215. doi: 10.1111/j.1600-0706.2010.18898.x

- 357 Duarte, L. D. S., Bergamin, R. S., Marcilio-Silva, V., Seger, G. D. S. & Marques, M. C. M.  
358 (2014). Phylobetadiversity among forest types in the Brazilian Atlantic Forest complex.  
359 PLoS ONE 9:e105043. doi: 10.1371/journal.pone.0105043
- 360 Duarte, L. D. S., Debastiani, V. J., Freitas, A. V. L. & Pillar, V. D. (2016). Dissecting  
361 phylogenetic fuzzy weighting: theory and application in metacommunity phylogenetics.  
362 *Methods in Ecology and Evolution*, 7, 937-946. doi: 10.1111/2041-210X.12547
- 363 Epperson, B. K. (2005). Estimating dispersal from short distance spatial autocorrelation.  
364 *Heredity*, 95, 7-15. doi: 10.1038/sj.hdy.6800680
- 365 Excoffier, L., Smouse, P. E. & Quattro, J. M. (1992). Analysis of molecular variance inferred  
366 from metric distances among DNA haplotypes: Application to human mitochondrial  
367 DNA restriction data. *Genetics*, 131, 479-491.
- 368 Fitzpatrick, B. M. (2009). Power and sample size for nested analysis of molecular variance.  
369 *Molecular Ecology*, 18, 3961-6. doi: 10.1111/j.1365-294X.2009.04314.x
- 370 Freeland, J. R. (2014). *Molecular Ecology*. In: eLS. John Wiley & Sons, Ltd: Chichester. doi:  
371 10.1002/9780470015902.a0003268.pub2
- 372 Jackson, D. A. (1995). Procrustes: A Procrustean Randomization test of community environment  
373 concordance. *Ecoscience*, 2, 297-303. doi: 10.1080/11956860.1995.11682297
- 374 Kembel, S. W., Cowan, P. D., Helmus, M. R., Cornwell, W. K., Morlon, H., Ackerly, D. D.,  
375 ... Webb, C. O. (2010). Picante: R tools for integrating phylogenies and ecology.  
376 *Bioinformatics*, 26, 1463-4. doi: 10.1093/bioinformatics/btq166
- 377 Kong, S., Sánchez-Pacheco, S. J. & Murphy, R. W. (2015). On the use of median-joining  
378 networks in evolutionary biology. *Cladistics*, 32, 691-699. doi: 10.1111/cla.12147
- 379 Legendre, P. & Legendre, L. (2012) *Numerical Ecology* (3rd ed.). Elsevier, Amsterdam.
- 380 Lima, N. E., Lima-Ribeiro, M. S., Tinoco, C. F., Terribile, L. C. & Collevatti, R. G. (2014).  
381 Phylogeography and ecological niche modelling, coupled with the fossil pollen record,  
382 unravel the demographic history of a Neotropical swamp palm through the Quaternary.  
383 *Journal of Biogeography*. doi: 10.1111/jbi.12269
- 384 Lima, J. S., Telles, M. P. C., Chaves, L. C., Lima-Ribeiro, M. S. & Collevatti, R. G. (2017).  
385 Demographic stability and high historical connectivity explain the diversity of a savanna  
386 tree species in the Quaternary. *Annals of Botany*, 119, 645-657. doi:  
387 10.1093/aob/mcw257
- 388 Maestri, R., Fornel, R., Gonçalves, G. L., Geise, L., Freitas, T. R. O. & Carnaval, A. C.  
389 (2016). Predictors of intraspecific morphological variability in a tropical hotspot:  
390 comparing the influence of random and non-random factors. *Journal of Biogeography*,  
391 43, 2160-2172. doi: 10.1111/jbi.12815
- 392 Mardulyn, P. (2012). Trees and/or networks to display intraspecific DNA sequence variation?  
393 *Molecular Ecology*, 21, 3385-3390. doi: 10.1111/j.1365-294X.2012.05622.x
- 394 Manel, M., Schwartz, M. K., Luikart, G. & Taberlet, P. (2003). Landscape genetics: combining  
395 landscape ecology and population genetics. *Trends in Ecology and Evolution*, 18, 189-  
396 197. doi: 10.1016/S0169-5347(03)00008-9
- 397 McArdle, B. H. & Anderson, M. J. (2001). Fitting multivariate models to community data: a  
398 comment on distance-based redundancy analysis. *Ecology*, 82, 290-297. doi:  
399 10.1890/0012-9658(2001)082[0290:FMMTCD]2.0.CO;2
- 400 Miller, M. P. (2005). Alleles in Space: computer software for the joint analysis of  
401 interindividual spatial and genetic information. *Journal of Heredity*, 96, 722-724. doi:  
402 10.1093/jhered/esi119



- 403 Papadopoulou, A. & Knowles, L. L. (2016). Toward a paradigm shift in comparative  
404 phylogeography driven by trait-based hypotheses. *PNAS*, *113*, 8018-8024. doi:  
405 10.1073/pnas.1601069113
- 406 Paradis, E. (2010). pegas: an R package for population genetics with an integrated modular  
407 approach. *Bioinformatics*, *26*, 419-420. doi:10.1093/bioinformatics/btp696
- 408 Pillar, V. & Orłóci, L. (1996). On randomization testing in vegetation science: multifactor  
409 comparisons of relevé groups. *Journal of Vegetation Science*, *7*, 585-592. doi:  
410 10.2307/3236308
- 411 Pillar, V. & Duarte, L. S. (2010). A framework for metacommunity analysis of phylogenetic  
412 structure. *Ecology Letters*, *13*, 587–596. doi: 10.1111/j.1461-0248.2010.01456.x
- 413 Raffini, F., Fruciano, C. & Meyer, A. (2018). Morphological and genetic correlates in the  
414 left–right asymmetric scale-eating cichlid fish of Lake Tanganyika. *Biological Journal of*  
415 *the Linnean Society*, *124*, 67-84. doi: 10.1093/biolinnean/bly024
- 416 Storfer, A., Murphy, M. A., Evans, J. S., Goldberg, C. S., Robinson, S., Spear, S. F., ... Waits,  
417 L. P. (2007). Putting the ‘landscape’ in landscape genetics. *Heredity*, *98*, 128-142. doi:  
418 10.1038/sj.hdy.6800917
- 419 Templeton, A. R. (1998). Nested clade analysis of phylogeographical data: testing hypotheses  
420 about gene flow and population history. *Molecular Ecology*, *7*, 381-397. doi:  
421 10.1046/j.1365-294x.1998.00308.x
- 422 Templeton, A. R. (2004). Statistical phylogeography: methods of evaluating and minimizing  
423 inference errors. *Molecular Ecology*, *13*, 789-809. doi: 10.1046/j.1365-  
424 294X.2003.02041.x
- 425 Turchetto-Zolet, A. C., Pinheiro, F., Salgueiro, F. & Palma-Silva, C. (2013).  
426 Phylogeographical patterns shed light on evolutionary process in South America.  
427 *Molecular Ecology*, *22*, 1193-1213. doi: 10.1111/mec.12164
- 428 Zadeh, L. A. (1965). Fuzzy sets. *Information and Control*, *8*, 338-353. doi: 10.1016/S0019-  
429 9958(65)90241-X
- 430

431 **Data accessibility**

432 The data are archived in GenBank (accession numbers: MF752706-MF753038 and  
433 KC527837-KC528609).

434 **Author contributions**

435 LD designed research; All authors performed research; LD and JL analyzed data; all authors  
436 wrote the paper.

437

438 **Table 1.** Comparison between results obtained by Analysis of Molecular Variance (AMOVA) and null model  
 439 tests implemented in HaploVectors.  $D_P$  - haplotypic dissimilarities between localities computed based on matrix  
 440 **P.**

| Source                | Case species               | Question                           | Method                | Results                                                                                                                    |                           |                    |                                                                                                                           |
|-----------------------|----------------------------|------------------------------------|-----------------------|----------------------------------------------------------------------------------------------------------------------------|---------------------------|--------------------|---------------------------------------------------------------------------------------------------------------------------|
| Lima et al.<br>(2017) | <i>Eugenia dysenterica</i> | Differences among Cerrado regions? | AMOVA                 | $F_{CT} = 0.164; P < 0.001$                                                                                                |                           |                    |                                                                                                                           |
|                       |                            |                                    | ADONIS on $D_P$       | $R^2 = 0.20; F_{Obs} = 5.38; P_{site\ shuffle} = 0.001,$<br>$P_{network\ shuffle} = 0.973$<br><i>Haplovector 1 (32%):</i>  |                           |                    |                                                                                                                           |
|                       |                            |                                    | OLS on haploectors    | $R^2 = 0.58; F_{Obs} = 11.44; P_{site\ shuffle} = 0.001,$<br>$P_{network\ shuffle} = 0.936$<br><i>Haplovector 2 (17%):</i> |                           |                    |                                                                                                                           |
|                       |                            |                                    |                       | $R^2 = 0.15; F_{Obs} = 2.36; P_{site\ shuffle} = 0.016,$<br>$P_{network\ shuffle} = 0.024$<br><i>Haplovector 3 (11%):</i>  |                           |                    |                                                                                                                           |
|                       |                            |                                    |                       | $R^2 < 0.01; F_{Obs} = 0.34; P_{site\ shuffle} = 0.608,$<br>$P_{network\ shuffle} = 0.854$<br><i>Haplovector 4 (9%):</i>   |                           |                    |                                                                                                                           |
|                       |                            |                                    |                       | $R^2 < 0.01; F_{Obs} = 0.67; P_{site\ shuffle} = 0.432,$<br>$P_{network\ shuffle} = 0.111$                                 |                           |                    |                                                                                                                           |
|                       |                            |                                    | Lima et al.<br>(2014) | <i>Mauritia flexuosa</i>                                                                                                   | Differences among basins? | AMOVA              | $F_{CT} = 0.387; P < 0.050$                                                                                               |
|                       |                            |                                    |                       |                                                                                                                            |                           | ADONIS on $D_P$    | $R^2 = 0.23; F_{Obs} = 2.24; P_{site\ shuffle} = 0.010,$<br>$P_{network\ shuffle} = 0.005$<br><i>Haplovector 1 (42%):</i> |
|                       |                            |                                    |                       |                                                                                                                            |                           | OLS on haploectors | $R^2 = 0.24; F_{Obs} = 2.78; P_{site\ shuffle} = 0.021,$<br>$P_{network\ shuffle} = 0.007$<br><i>Haplovector 2 (19%):</i> |
|                       |                            |                                    |                       |                                                                                                                            |                           |                    | $R^2 = 0.07; F_{Obs} = 1.23; P_{site\ shuffle} = 0.211,$<br>$P_{network\ shuffle} = 0.460$<br><i>Haplovector 3 (13%):</i> |
|                       |                            |                                    |                       |                                                                                                                            |                           |                    | $R^2 = 0.03; F_{Obs} = 0.93; P_{site\ shuffle} = 0.304,$<br>$P_{network\ shuffle} = 0.695$<br><i>Haplovector 4 (6%):</i>  |
|                       |                            |                                    |                       |                                                                                                                            |                           |                    | $R^2 = 0.03; F_{Obs} = 1.28; P_{site\ shuffle} = 0.204,$<br>$P_{network\ shuffle} = 0.680$                                |

441

442

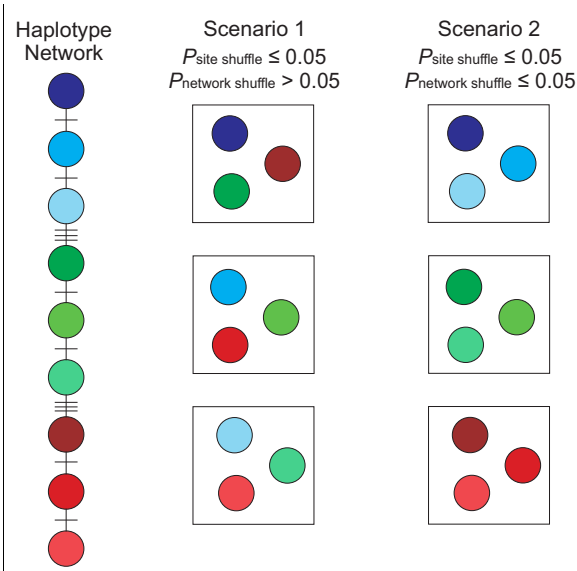

443  
444  
445  
446  
447  
448  
449  
450  
451

**Fig. 1.** Expected distribution of haplotypes (colors denote different haplotypes) across localities (squares) and the respective probabilities of homogeneity of haplotype composition among localities, under site and network shuffle null models. Scenario 1): Localities contain different haplotypes ( $P_{\text{site shuffle}} \leq 0.05$ ), but variation of haplotype composition among sites is not associated with evolutionary structure depicted by the haplotype network ( $P_{\text{network shuffle}} > 0.05$ ). Scenario 2): Localities contain different haplotypes ( $P_{\text{site shuffle}} \leq 0.05$ ), and haplotype distribution across sites is mediated by evolutionary relatedness among them ( $P_{\text{network shuffle}} \leq 0.05$ ).

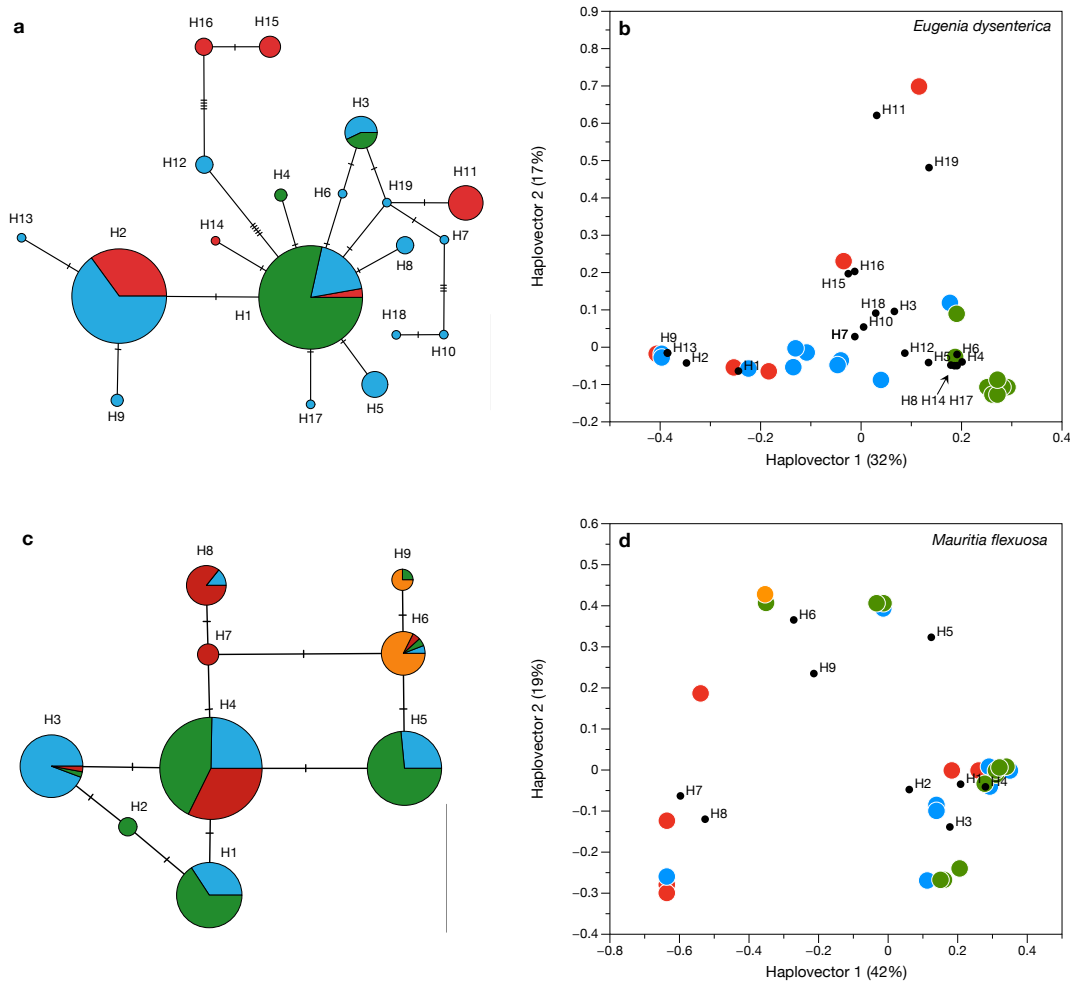

452

453 **Fig. 2.** Haplotype networks and their respective scatter plots of haploectors computed for two datasets. 1a-b)  
 454 *Eugenia dysenterica* (Lima et al. 2017). Red, blue and green circles indicate Northeast, Central and Southeastern  
 455 biogeographic regions of the Brazilian Cerrado biome, respectively. a) MJN haplotypic network; b) Scatter plot  
 456 for the two first haploectors. Black circles indicate haplotypes (H1-H19). 1c-d) *Mauritia flexuosa* (Lima et al.  
 457 2014). Red, blue, orange and green circles indicate Amazon, Paraná, São Francisco and Araguaia/Tocantins river  
 458 basins in South America, respectively. c) MJN haplotypic network; d) Scatter plot for the two first haploectors.  
 459 Black circles indicate haplotypes (H1-H9).  
 460
